# Supplementary material for: Proteomic analysis of synovial fluid from rheumatic arthritis and spondyloarthritis patients
Source: Clin Proteomics. 2020 Aug 6;17:29. doi: 10.1186/s12014-020-09292-9 (PMC7412817; doi:10.1186/s12014-020-09292-9)
Supplement: Supplementary file 1 — Additional file 1. Combined list of identified proteins in all samples. [file 12014_2020_9292_MOESM1_ESM.xlsx]

## Sheet: Sheet1
Combined list of identified proteins in all samples
Protein names	UniProt Accession no.	Gene names	Peptides	Razor + unique peptides	Unique peptides	Sequence coverage [%]	Unique + razor sequence coverage [%]	Unique sequence coverage [%]	Mol. weight [kDa]	MaxQuant Score	Intensity	MS/MS count
Ig kappa chain V-II region FR	A0A075B6P5;P01615	IGKV2D-28	4	2	2	46.7	30	30	12.957	176.32	9983600000	571
Ig kappa chain V-II region RPMI 6410	A0A075B6S6;P06310	IGKV2D-30	3	2	2	36.7	36.7	36.7	13.215	131.24	4421100000	245
Ig kappa chain V-II region Cum	A0A087WW87;P01614	IGKV2-40	5	5	3	48.8	48.8	32.2	13.31	91.13	8245100000	140
Ig kappa chain V-III region VG	A0A0A0MRZ8;P04433	IGKV3D-11	9	4	4	56.5	39.1	39.1	12.625	32.713	3504600000	109
Ig heavy chain V-I region EU	A0A0B4J2H0;P01742	IGHV1-69-2	9	9	4	70.9	70.9	51.3	12.66	239.16	5309900000	169
Ig kappa chain V-I region Wes	A0A0C4DH73;P01611	IGKV1-12	4	2	2	44.4	30.8	30.8	12.645	95.995	2350900000	67
Putative neutrophil cytosol factor 1C;Neutrophil cytosol factor 1;Putative neutrophil cytosol factor 1B	A8MVU1;P14598;A6NI72	NCF1C;NCF1;NCF1B	1	1	1	6.3	6.3	6.3	41.85	6.09	73711000	7
Immunoglobulin lambda-like polypeptide 5;Ig lambda-1 chain C regions	B9A064;P0CG04	IGLL5;IGLC1	13	13	2	36	36	12.6	23.063	323.31	340810000000	3451
Apolipoprotein L1	O14791	APOL1	6	6	6	23.9	23.9	23.9	43.974	35.53	1865500000	81
Transcription intermediary factor 1-alpha	O15164	TRIM24	2	2	2	3.2	3.2	3.2	116.83	6.3978	4307600000	155
CD5 antigen-like	O43866	CD5L	9	9	9	41.5	41.5	41.5	38.087	323.31	6979900000	393
Histone H2B type 1-L;Histone H2B type 1-M;Histone H2B type 1-N;Histone H2B type 1-H;Histone H2B type 3-B;Histone H2B type 2-F;Histone H2B type 2-E;Histone H2B type 1-C/E/F/G/I;Histone H2B type 1-D;Histone H2B type F-S;Histone H2B type 1-B;Histone H2B type 1-O;Histone H2B type 1-J;Histone H2B type 1-K	Q99880;Q99879;Q99877;Q93079;Q8N257;Q5QNW6;Q16778;P62807;P58876;P57053;P33778;P23527;P06899;O60814	HIST1H2BL;HIST1H2BM;HIST1H2BN;HIST1H2BH;HIST3H2BB;HIST2H2BF;HIST2H2BE;HIST1H2BC;HIST1H2BD;H2BFS;HIST1H2BB;HIST1H2BO;HIST1H2BJ;HIST1H2BK	3	3	3	11.9	11.9	11.9	13.952	61.966	1338500000	82
Ficolin-3	O75636	FCN3	3	3	3	18.4	18.4	18.4	32.903	10.455	1091900000	49
Attractin	O75882	ATRN	6	6	6	5.4	5.4	5.4	158.54	22.133	1141100000	136
Apolipoprotein M	O95445	APOM	2	2	2	7.4	7.4	7.4	21.253	12.541	1066200000	77
Actin-like protein 6A	O96019	ACTL6A	1	1	1	3.5	3.5	3.5	47.46	8.3864	87345000	4
L-lactate dehydrogenase A chain	P00338	LDHA	5	5	5	19.3	19.3	19.3	36.688	19.758	182330000	16
Ceruloplasmin	P00450	CP	50	50	50	53.9	53.9	53.9	122.2	323.31	294720000000	8306
Phosphoglycerate kinase 1	P00558	PGK1	3	3	3	12.5	12.5	12.5	44.614	55.223	1013000000	42
Prothrombin;Activation peptide fragment 1;Activation peptide fragment 2;Thrombin light chain;Thrombin heavy chain	P00734	F2	24	24	24	49.2	49.2	49.2	70.036	323.31	51730000000	1972
Complement C1r subcomponent;Complement C1r subcomponent heavy chain;Complement C1r subcomponent light chain	P00736	C1R	15	15	15	28.1	28.1	28.1	80.118	259.1	7096300000	620
Haptoglobin;Haptoglobin alpha chain;Haptoglobin beta chain	P00738	HP	37	37	16	62.3	62.3	41.4	45.205	323.31	436640000000	3846
Haptoglobin-related protein	P00739	HPR	27	6	6	53.2	23.9	23.9	39.029	148.6	17724000000	560
Coagulation factor IX;Coagulation factor IXa light chain;Coagulation factor IXa heavy chain	P00740	F9	4	4	4	9.3	9.3	9.3	51.778	10.205	185030000	5
Coagulation factor X;Factor X light chain;Factor X heavy chain;Activated factor Xa heavy chain	P00742	F10	2	2	2	6.1	6.1	6.1	54.731	7.0294	1221400000	109
Complement factor D	P00746	CFD	8	8	8	51.4	51.4	51.4	27.033	32.807	6440400000	307
Plasminogen;Plasmin heavy chain A;Activation peptide;Angiostatin;Plasmin heavy chain A, short form;Plasmin light chain B	P00747	PLG	34	34	32	52.2	52.2	50.1	90.568	323.31	65543000000	2148
Coagulation factor XII;Coagulation factor XIIa heavy chain;Beta-factor XIIa part 1;Coagulation factor XIIa light chain	P00748	F12	9	9	9	20.2	20.2	20.2	67.791	200.47	15048000000	851
Complement factor B;Complement factor B Ba fragment;Complement factor B Bb fragment	P00751	CFB	38	38	38	49.2	49.2	49.2	85.532	323.31	83391000000	2081
Carbonic anhydrase 1	P00915	CA1	17	17	17	72	72	72	28.87	323.31	80104000000	2005
Carbonic anhydrase 2	P00918	CA2	17	17	17	60.4	60.4	60.4	29.246	323.31	84365000000	1962
Antithrombin-III	P01008	SERPINC1	26	26	26	51.1	51.1	51.1	52.602	323.31	162730000000	4612
Alpha-1-antitrypsin;Short peptide from AAT	P01009	SERPINA1	63	63	63	73.7	73.7	73.7	46.736	323.31	1200800000000	13706
Alpha-1-antichymotrypsin;Alpha-1-antichymotrypsin His-Pro-less	P01011	SERPINA3	35	35	34	63.4	63.4	63.4	47.65	323.31	288010000000	3796
Angiotensinogen;Angiotensin-1;Angiotensin-2;Angiotensin-3;Angiotensin-4;Angiotensin 1-9;Angiotensin 1-7;Angiotensin 1-5;Angiotensin 1-4	P01019	AGT	19	19	19	42.3	42.3	42.3	53.154	157.57	37589000000	1804
Alpha-2-macroglobulin	P01023	A2M	97	97	84	64.7	64.7	57.9	163.29	323.31	1048800000000	16494
Complement C3;Complement C3 beta chain;C3-beta-c;Complement C3 alpha chain;C3a anaphylatoxin;Acylation stimulating protein;Complement C3b alpha chain;Complement C3c alpha chain fragment 1;Complement C3dg fragment;Complement C3g fragment;Complement C3d fragment;Complement C3f fragment;Complement C3c alpha chain fragment 2	P01024	C3	139	139	139	70.3	70.3	70.3	187.15	323.31	1019100000000	18762
Complement C5;Complement C5 beta chain;Complement C5 alpha chain;C5a anaphylatoxin;Complement C5 alpha chain	P01031	C5	31	31	31	25.4	25.4	25.4	188.3	232.04	20459000000	1311
Metalloproteinase inhibitor 1	P01033	TIMP1	4	4	4	28	28	28	23.171	45.374	562660000	13
Cystatin-C	P01034	CST3	4	4	4	44.5	44.5	44.5	15.799	11.123	550240000	14
Kininogen-1;Kininogen-1 heavy chain;T-kinin;Bradykinin;Lysyl-bradykinin;Kininogen-1 light chain;Low molecular weight growth-promoting factor	P01042	KNG1	23	23	23	36.8	36.8	36.8	71.957	323.31	136980000000	1923
Immunoglobulin J chain	P01591	IGJ	5	5	5	37.1	37.1	37.1	18.098	49.206	2677700000	142
Ig kappa chain V-I region HK102	P01602	IGKV1-5	5	5	4	44.4	44.4	44.4	12.781	106.46	10914000000	363
Ig heavy chain V-III region 23	P01764	IGHV3-23	10	10	3	70.1	70.1	35	12.582	202.55	40494000000	631
Ig kappa chain C region	P01834	IGKC	18	18	18	82.2	82.2	82.2	11.765	323.31	661390000000	9703
Ig gamma-1 chain C region	P01857	IGHG1	61	61	20	70.3	70.3	33.9	36.105	323.31	2424900000000	15001
Ig gamma-2 chain C region	P01859	IGHG2	35	9	9	70.9	35.3	35.3	35.9	323.31	334480000000	1998
Ig gamma-3 chain C region	P01860	IGHG3	37	11	4	55.4	30.2	17.2	41.287	323.31	323400000000	3247
Ig gamma-4 chain C region	P01861	IGHG4	36	10	9	64.5	36.1	31.8	35.94	323.31	92790000000	1041
Ig mu chain C region;Ig mu heavy chain disease protein	P01871;P04220	IGHM	23	23	23	54.3	54.3	54.3	49.439	323.31	130830000000	4065
Ig alpha-1 chain C region	P01876	IGHA1	25	25	16	53	53	39.9	37.654	323.31	450090000000	4218
Ig alpha-2 chain C region	P01877	IGHA2	12	3	3	30.6	15.6	15.6	36.591	86.591	2226000000	64
Ig delta chain C region	P01880	IGHD	6	6	6	23.2	23.2	23.2	42.352	196.97	2315900000	147
HLA class I histocompatibility antigen, B-59 alpha chain;HLA class I histocompatibility antigen, B-35 alpha chain;HLA class I histocompatibility antigen, B-78 alpha chain;HLA class I histocompatibility antigen, B-56 alpha chain;HLA class I histocompatibility antigen, B-55 alpha chain;HLA class I histocompatibility antigen, B-54 alpha chain;HLA class I histocompatibility antigen, B-53 alpha chain;…	Q29940;P30685;P30498;P30495;P30493;P30492;P30491;P30490;P30484;P30464;P18465;P18464;P10319;P30512;P30459;P30457;P30456;P30455;P30453;P30450;P30447;P30443;P18462;P16190;P16189;P16188;P13746;P10316;P10314;P05534;P04439;P01892;P01891;Q29960;Q07000;P30510;P30508;P30504;P30501;P04222;Q95604	HLA-B;HLA-A;HLA-C	1	1	1	3.9	3.9	3.9	40.584	5.6726	181240000	13
Hemoglobin subunit delta	P02042	HBD	7	1	1	46.9	12.9	12.9	16.055	8.2564	132970000	11
Collagen alpha-1(I) chain	P02452	COL1A1	3	3	3	3.3	3.3	3.3	138.94	9.0037	1930400000	7
Apolipoprotein A-I;Proapolipoprotein A-I;Truncated apolipoprotein A-I	P02647	APOA1	44	44	44	74.9	74.9	74.9	30.777	323.31	1640000000000	12847
Apolipoprotein E	P02649	APOE	13	13	13	47.6	47.6	47.6	36.154	323.31	16155000000	550
Apolipoprotein A-II;Proapolipoprotein A-II;Truncated apolipoprotein A-II	P02652	APOA2	17	17	17	59	59	59	11.175	323.31	199620000000	1961
Apolipoprotein C-I;Truncated apolipoprotein C-I	P02654	APOC1	11	11	11	41	41	41	9.3318	323.31	26348000000	890
Apolipoprotein C-II;Proapolipoprotein C-II	P02655	APOC2	7	7	7	51.5	51.5	51.5	11.284	99.063	5633300000	441
Apolipoprotein C-III	P02656	APOC3	6	6	6	72.7	72.7	72.7	10.852	263.61	14487000000	451
Fibrinogen alpha chain;Fibrinopeptide A;Fibrinogen alpha chain	P02671	FGA	43	43	43	42	42	42	94.972	323.31	199550000000	3749
Fibrinogen beta chain;Fibrinopeptide B;Fibrinogen beta chain	P02675	FGB	41	41	41	64.2	64.2	64.2	55.928	323.31	250460000000	3963
Fibrinogen gamma chain	P02679	FGG	27	27	27	60.9	60.9	60.9	51.511	323.31	337560000000	4015
C-reactive protein;C-reactive protein(1-205)	P02741	CRP	6	6	6	22.3	22.3	22.3	25.038	34.258	13682000000	430
Serum amyloid P-component;Serum amyloid P-component(1-203)	P02743	APCS	5	5	5	22	22	22	25.387	52.429	5551300000	287
Complement C1q subcomponent subunit B	P02746	C1QB	4	4	4	20.2	20.2	20.2	26.721	53.361	2121700000	83
Complement C1q subcomponent subunit C	P02747	C1QC	4	4	4	21.2	21.2	21.2	25.773	64.235	2212300000	119
Complement component C9;Complement component C9a;Complement component C9b	P02748	C9	20	20	20	30.8	30.8	30.8	63.173	263.87	38812000000	1473
Beta-2-glycoprotein 1	P02749	APOH	13	13	13	48.1	48.1	48.1	38.298	323.31	71443000000	2077
Leucine-rich alpha-2-glycoprotein	P02750	LRG1	10	10	10	40.9	40.9	40.9	38.177	323.31	26613000000	2071
Fibronectin;Anastellin;Ugl-Y1;Ugl-Y2;Ugl-Y3	P02751	FN1	84	84	84	43.6	43.6	43.6	262.62	323.31	368850000000	9081
Retinol-binding protein 4;Plasma retinol-binding protein(1-182);Plasma retinol-binding protein(1-181);Plasma retinol-binding protein(1-179);Plasma retinol-binding protein(1-176)	P02753	RBP4	10	10	10	58.2	58.2	58.2	23.01	239.33	13100000000	703
Protein AMBP;Alpha-1-microglobulin;Inter-alpha-trypsin inhibitor light chain;Trypstatin	P02760	AMBP	11	11	11	39.8	39.8	39.8	38.999	151.98	22114000000	886
Alpha-1-acid glycoprotein 1	P02763	ORM1	17	17	12	51.2	51.2	32.8	23.511	323.31	558240000000	3444
Alpha-2-HS-glycoprotein;Alpha-2-HS-glycoprotein chain A;Alpha-2-HS-glycoprotein chain B	P02765	AHSG	13	13	13	39.5	39.5	39.5	39.324	323.31	58618000000	1841
Transthyretin	P02766	TTR	25	25	25	69.4	69.4	69.4	15.887	323.31	405510000000	5221
Serum albumin	P02768	ALB	220	220	220	87.7	87.7	87.7	69.366	323.31	15944000000000	104630
Vitamin D-binding protein	P02774	GC	26	26	26	55.9	55.9	55.9	52.963	323.31	164210000000	5138
Platelet basic protein;Connective tissue-activating peptide III;TC-2;Connective tissue-activating peptide III(1-81);Beta-thromboglobulin;Neutrophil-activating peptide 2(74);Neutrophil-activating peptide 2(73);Neutrophil-activating peptide 2;TC-1;Neutrophil-activating peptide 2(1-66);Neutrophil-activating peptide 2(1-63)	P02775	PPBP	3	3	3	30.5	30.5	30.5	13.894	13.433	123700000	7
Serotransferrin	P02787	TF	84	84	83	74.8	74.8	74.8	77.063	323.31	1444500000000	12948
Lactotransferrin;Lactoferricin-H;Kaliocin-1;Lactoferroxin-A;Lactoferroxin-B;Lactoferroxin-C	P02788	LTF	20	19	19	37	35.5	35.5	78.181	158.84	4200900000	240
Hemopexin	P02790	HPX	46	46	46	67.1	67.1	67.1	51.676	323.31	697630000000	6515
Plasma kallikrein;Plasma kallikrein heavy chain;Plasma kallikrein light chain	P03952	KLKB1	10	10	10	17.4	17.4	17.4	71.369	86.138	4432100000	331
Interstitial collagenase;22 kDa interstitial collagenase;27 kDa interstitial collagenase	P03956	MMP1	3	3	3	8.1	8.1	8.1	54.006	6.7732	288020000	19
C4b-binding protein alpha chain	P04003	C4BPA	17	17	17	41.9	41.9	41.9	67.033	276.54	15826000000	662
Vitronectin;Vitronectin V65 subunit;Vitronectin V10 subunit;Somatomedin-B	P04004	VTN	10	10	10	21.8	21.8	21.8	54.305	129.07	43101000000	945
Catalase	P04040	CAT	9	9	9	26.2	26.2	26.2	59.755	31.188	3153900000	208
Fructose-bisphosphate aldolase A	P04075	ALDOA	5	5	5	26.6	26.6	26.6	39.42	24.987	511040000	18
Annexin A1	P04083	ANXA1	10	10	10	39.9	39.9	39.9	38.714	178.79	1862000000	120
Apolipoprotein B-100;Apolipoprotein B-48	P04114	APOB	187	187	187	48.6	48.6	48.6	515.6	323.31	388020000000	15716
Histidine-rich glycoprotein	P04196	HRG	22	22	22	40.2	40.2	40.2	59.578	261.44	86290000000	2443
Alpha-1B-glycoprotein	P04217	A1BG	21	21	21	47.5	47.5	47.5	54.253	323.31	152750000000	3863
von Willebrand factor;von Willebrand antigen 2	P04275	VWF	3	3	3	1.8	1.8	1.8	309.26	9.8468	94500000	4
Sex hormone-binding globulin	P04278	SHBG	7	7	7	27.4	27.4	27.4	43.779	23.146	1611400000	131
Glyceraldehyde-3-phosphate dehydrogenase	P04406	GAPDH	10	10	10	37.9	37.9	37.9	36.053	155.73	4839800000	199
Histone H2A type 1-J;Histone H2A type 1-H;Histone H2A.J;Histone H2A type 2-C;Histone H2A type 1-C;Histone H2A type 3;Histone H2A type 2-A;Histone H2A type 1-D;Histone H2A type 1;Histone H2A type 1-B/E;Histone H2A type 2-B;Histone H2A type 1-A;Histone H2AX	Q99878;Q96KK5;Q9BTM1;Q16777;Q93077;Q7L7L0;Q6FI13;P20671;P0C0S8;P04908;Q8IUE6;Q96QV6;P16104	HIST1H2AJ;HIST1H2AH;H2AFJ;HIST2H2AC;HIST1H2AC;HIST3H2A;HIST2H2AA3;HIST1H2AD;HIST1H2AG;HIST1H2AB;HIST2H2AB;HIST1H2AA;H2AFX	2	2	2	14.8	14.8	14.8	13.936	16.417	815350000	31
Apolipoprotein D	P05090	APOD	4	4	4	20.1	20.1	20.1	21.275	53.81	2488600000	150
Protein S100-A8;Protein S100-A8, N-terminally processed	P05109	S100A8	9	9	9	59.1	59.1	59.1	10.834	126.87	13754000000	166
Plasma serine protease inhibitor	P05154	SERPINA5	4	4	4	12.6	12.6	12.6	45.674	21.869	674590000	40
Plasma protease C1 inhibitor	P05155	SERPING1	16	16	16	28.4	28.4	28.4	55.154	323.31	71936000000	2019
Complement factor I;Complement factor I heavy chain;Complement factor I light chain	P05156	CFI	15	15	15	29	29	29	65.75	323.31	22206000000	966
Myeloperoxidase;Myeloperoxidase;89 kDa myeloperoxidase;84 kDa myeloperoxidase;Myeloperoxidase light chain;Myeloperoxidase heavy chain	P05164	MPO	17	17	17	32.6	32.6	32.6	83.868	107.66	1922000000	101
Tetranectin	P05452	CLEC3B	6	6	6	35.6	35.6	35.6	22.537	87.996	6014200000	586
Thyroxine-binding globulin	P05543	SERPINA7	8	8	8	28.2	28.2	28.2	46.324	87.122	8098900000	576
Heparin cofactor 2	P05546	SERPIND1	12	12	12	26.7	26.7	26.7	57.07	147.57	6839300000	356
Ig kappa chain V-IV region	P06312	IGKV4-1	4	3	3	34.7	34.7	34.7	13.38	179.69	45292000000	805
Gelsolin	P06396	GSN	25	25	25	40.9	40.9	40.9	85.696	323.31	48261000000	2068
Complement C2;Complement C2b fragment;Complement C2a fragment	P06681	C2	15	15	15	21.7	21.7	21.7	83.267	68.326	7401700000	371
Protein S100-A9	P06702	S100A9	13	13	13	82.5	82.5	82.5	13.242	323.31	64704000000	925
Apolipoprotein A-IV	P06727	APOA4	33	33	33	69.2	69.2	69.2	45.398	323.31	124190000000	2722
Alpha-enolase	P06733	ENO1	10	10	10	34.6	34.6	34.6	47.168	113.2	4198500000	238
Glycogen phosphorylase, liver form	P06737	PYGL	2	2	2	3.3	3.3	3.3	97.147	8.6103	94288000	8
Glucose-6-phosphate isomerase	P06744	GPI	3	3	3	8.2	8.2	8.2	63.146	7.667	307220000	16
L-lactate dehydrogenase B chain	P07195	LDHB	1	1	1	4.5	4.5	4.5	36.638	6.9582	108250000	3
Vitamin K-dependent protein S	P07225	PROS1	10	10	10	14.9	14.9	14.9	75.122	106.15	7272400000	386
Annexin A2;Putative annexin A2-like protein	P07355;A6NMY6	ANXA2;ANXA2P2	2	2	2	8.8	8.8	8.8	38.604	5.8411	170700000	6
Complement component C8 alpha chain	P07357	C8A	9	9	9	21.2	21.2	21.2	65.163	248	12555000000	589
Complement component C8 beta chain	P07358	C8B	12	12	12	24.2	24.2	24.2	67.046	62.962	7935700000	614
Complement component C8 gamma chain	P07360	C8G	6	6	6	40.6	40.6	40.6	22.277	102.52	10901000000	773
Tubulin beta chain;Tubulin beta-4B chain;Tubulin beta-4A chain;Tubulin beta-2B chain;Tubulin beta-2A chain	P07437;P68371;P04350;Q9BVA1;Q13885	TUBB;TUBB4B;TUBB4A;TUBB2B;TUBB2A	5	5	5	15.8	15.8	15.8	49.67	83.115	236180000	13
Profilin-1	P07737	PFN1	5	5	5	59.3	59.3	59.3	15.054	25.365	2641600000	185
Heat shock protein HSP 90-alpha;Heat shock protein HSP 90-beta	P07900;P08238	HSP90AA1;HSP90AB1	5	5	5	7.5	7.5	7.5	84.659	13.309	164710000	11
Annexin A6	P08133	ANXA6	5	5	5	12.2	12.2	12.2	75.872	10.657	315570000	18
Corticosteroid-binding globulin	P08185	SERPINA6	9	8	8	34.1	30.4	30.4	45.14	149.29	20513000000	521
Neutrophil elastase	P08246	ELANE	4	4	4	22.1	22.1	22.1	28.518	15.782	413590000	8
72 kDa type IV collagenase;PEX	P08253	MMP2	3	3	3	6.5	6.5	6.5	73.881	9.7348	572650000	14
Stromelysin-1	P08254	MMP3	16	16	16	29.6	29.6	29.6	53.977	92.172	13955000000	431
Cathepsin G	P08311	CTSG	3	3	3	15.7	15.7	15.7	28.837	15.407	820320000	41
Apolipoprotein(a)	P08519	LPA	7	5	5	20	19.6	19.6	501.31	45.296	1111200000	62
Monocyte differentiation antigen CD14;Monocyte differentiation antigen CD14, urinary form;Monocyte differentiation antigen CD14, membrane-bound form	P08571	CD14	5	5	5	20.8	20.8	20.8	40.076	51.452	1885900000	171
Complement factor H	P08603	CFH	52	52	49	50.2	50.2	48.1	139.09	323.31	101180000000	3158
Low affinity immunoglobulin gamma Fc region receptor III-A	P08637	FCGR3A	2	2	1	9.1	9.1	4.3	29.089	5.2264	823520000	41
Vimentin	P08670	VIM	11	11	11	27.7	27.7	27.7	53.651	119.83	1984100000	83
Alpha-2-antiplasmin	P08697	SERPINF2	17	17	17	40.5	40.5	40.5	54.565	323.31	26115000000	1521
Glutathione S-transferase P	P09211	GSTP1	5	5	5	40	40	40	23.356	29.551	626740000	40
Galectin-1	P09382	LGALS1	2	2	2	25.2	25.2	25.2	14.716	10.694	1028900000	29
Fructose-1,6-bisphosphatase 1	P09467	FBP1	2	2	2	11.8	11.8	11.8	36.842	9.6128	168900000	7
Complement C1s subcomponent;Complement C1s subcomponent heavy chain;Complement C1s subcomponent light chain	P09871	C1S	11	11	11	24.1	24.1	24.1	76.684	137	7018600000	437
Leukotriene A-4 hydrolase	P09960	LTA4H	4	4	4	11	11	11	69.284	8.9451	310340000	8
Fructose-bisphosphate aldolase C	P09972	ALDOC	1	1	1	6.3	6.3	6.3	39.455	6.2115	45220000	2
Complement C4-A;Complement C4 beta chain;Complement C4-A alpha chain;C4a anaphylatoxin;C4b-A;C4d-A;Complement C4 gamma chain	P0C0L4	C4A	74	74	6	46.3	46.3	3.6	192.78	323.31	281490000000	8666
Complement C4-B;Complement C4 beta chain;Complement C4-B alpha chain;C4a anaphylatoxin;C4b-B;C4d-B;Complement C4 gamma chain	P0C0L5	C4B	71	3	3	45.1	2.4	2.4	192.75	23.804	4121700000	146
Serum amyloid A-1 protein;Amyloid protein A;Serum amyloid protein A(2-104);Serum amyloid protein A(3-104);Serum amyloid protein A(2-103);Serum amyloid protein A(2-102);Serum amyloid protein A(4-101)	P0DJI8	SAA1	12	12	5	67.2	67.2	43.4	13.532	323.31	38089000000	686
Serum amyloid A-2 protein	P0DJI9	SAA2	10	3	3	50.8	27	27	13.527	121.68	1046600000	44
Heat shock 70 kDa protein 1B;Heat shock 70 kDa protein 1A;Heat shock 70 kDa protein 6	P0DMV9;P0DMV8;P17066	HSPA1B;HSPA1A;HSPA6	4	4	4	8.6	8.6	8.6	70.051	14.529	179730000	15
Ig lambda-6 chain C region	P0DOY3;P0DOY2;P0CF74	IGLC6	12	1	1	65.1	17.9	17.9	11.265	49.794	46623000000	2467
Osteopontin	P10451	SPP1	1	1	1	5.4	5.4	5.4	35.422	6.1683	148060000	11
Complement component C7	P10643	C7	14	14	14	25.7	25.7	25.7	93.517	112.87	5875000000	388
Clusterin;Clusterin beta chain;Clusterin alpha chain	P10909	CLU	19	19	19	42.5	42.5	42.5	52.494	323.31	56413000000	1184
Hyaluronan and proteoglycan link protein 1	P10915	HAPLN1	2	2	2	9.3	9.3	9.3	40.165	4.9909	58140000	2
Heat shock-related 70 kDa protein 2;Heat shock cognate 71 kDa protein	P54652;P11142	HSPA2;HSPA8	3	3	3	4.5	4.5	4.5	70.02	7.6497	113720000	6
Collagen alpha-3(VI) chain	P12111	COL6A3	5	5	5	2.6	2.6	2.6	343.67	26.593	927590000	40
Annexin A3	P12429	ANXA3	3	3	3	12.4	12.4	12.4	36.375	6.7172	324100000	19
Alpha-actinin-1	P12814	ACTN1	10	10	10	15.2	15.2	15.2	103.06	32.475	554150000	31
Versican core protein	P13611	VCAN	2	2	2	0.6	0.6	0.6	372.82	6.9135	282960000	23
Elongation factor 2	P13639	EEF2	2	2	2	3.4	3.4	3.4	95.337	4.778	77518000	5
Complement component C6	P13671	C6	15	15	15	18.5	18.5	18.5	104.79	136.11	9483700000	550
Plastin-2	P13796	LCP1	15	15	15	37.5	37.5	37.5	70.288	86.712	5063400000	313
Pyruvate kinase PKM	P14618	PKM	14	14	14	41.1	41.1	41.1	57.936	259.03	3327000000	135
Matrix metalloproteinase-9;67 kDa matrix metalloproteinase-9;82 kDa matrix metalloproteinase-9	P14780	MMP9	4	4	4	8.2	8.2	8.2	78.457	25.723	320610000	28
Aminopeptidase N	P15144	ANPEP	2	2	2	2.9	2.9	2.9	109.54	4.7564	20252000	3
Ras-related C3 botulinum toxin substrate 2	P15153	RAC2	1	1	1	7.3	7.3	7.3	21.429	4.1057	155540000	7
Carboxypeptidase N catalytic chain	P15169	CPN1	3	3	3	10.7	10.7	10.7	52.286	8.22	866050000	31
NAD(P)H dehydrogenase [quinone] 1	P15559	NQO1	7	7	7	33.9	33.9	33.9	30.867	81.307	6512600000	564
Immunoglobulin lambda-like polypeptide 1	P15814	IGLL1	5	4	4	23	23	23	22.963	11.081	3523900000	8
Desmoplakin	P15924	DSP	1	1	1	0.5	0.5	0.5	331.77	4.3071	47782000	6
Aggrecan core protein;Aggrecan core protein 2	P16112	ACAN	11	11	11	5.2	5.2	5.2	250.19	124.14	3209100000	73
Cytotoxic T-lymphocyte protein 4	P16410	CTLA4	3	3	3	13	13	13	24.656	12.156	426620000	16
Lipopolysaccharide-binding protein	P18428	LBP	5	5	5	14.6	14.6	14.6	53.383	21.706	5202200000	336
Phosphoglycerate mutase 1;Phosphoglycerate mutase 2;Probable phosphoglycerate mutase 4	P18669;P15259;Q8N0Y7	PGAM1;PGAM2;PGAM4	2	2	2	13.8	13.8	13.8	28.804	23.451	602630000	6
Vascular cell adhesion protein 1	P19320	VCAM1	2	2	2	4.1	4.1	4.1	81.275	6.6583	283560000	24
Alpha-1-acid glycoprotein 2	P19652	ORM2	13	8	8	48.3	29.9	29.9	23.602	222.06	62685000000	1333
Inter-alpha-trypsin inhibitor heavy chain H2	P19823	ITIH2	24	24	24	27.9	27.9	27.9	106.46	323.31	80443000000	2444
Inter-alpha-trypsin inhibitor heavy chain H1	P19827	ITIH1	25	25	25	34.2	34.2	34.2	101.39	323.31	93011000000	2981
Azurocidin	P20160	AZU1	4	4	4	13.5	13.5	13.5	26.885	161.64	208000000	13
Pregnancy zone protein	P20742	PZP	31	18	18	26.2	18.3	18.3	163.86	323.31	16916000000	527
C4b-binding protein beta chain	P20851	C4BPB	4	4	4	22.6	22.6	22.6	28.357	9.0735	1022300000	34
Filamin-A	P21333	FLNA	5	5	5	3.9	3.9	3.9	280.74	13.557	86573000	7
Ubiquitin-like modifier-activating enzyme 1	P22314	UBA1	1	1	1	1.4	1.4	1.4	117.85	5.5667	40758000	3
Glutathione peroxidase 3	P22352	GPX3	3	3	3	19	19	19	25.552	7.8909	1044900000	62
Insulin-like growth factor-binding protein 4	P22692	IGFBP4	2	2	2	12.4	12.4	12.4	27.934	7.2447	136560000	3
Carboxypeptidase N subunit 2	P22792	CPN2	9	9	9	22.2	22.2	22.2	60.556	64.135	3314900000	154
Neutrophil collagenase	P22894	MMP8	3	3	3	8.1	8.1	8.1	53.411	7.4796	266880000	16
Fibulin-1	P23142	FBLN1	3	3	3	6.8	6.8	6.8	77.213	11.71	776440000	43
Cofilin-1	P23528	CFL1	5	5	5	46.4	46.4	46.4	18.502	48.148	648920000	42
Myeloblastin	P24158	PRTN3	4	4	4	20.7	20.7	20.7	27.807	10.348	808370000	34
Zinc-alpha-2-glycoprotein	P25311	AZGP1	16	16	16	52	52	52	34.258	323.31	50369000000	1655
Moesin	P26038	MSN	8	8	8	16.5	16.5	16.5	67.819	48.054	629250000	29
Serum paraoxonase/arylesterase 1	P27169	PON1	8	8	8	35.2	35.2	35.2	39.731	323.31	29527000000	1937
Properdin	P27918	CFP	2	2	2	6	6	6	51.276	5.1021	77540000	3
Transketolase	P29401	TKT	4	4	4	9.6	9.6	9.6	67.877	24.702	577100000	16
Kallistatin	P29622	SERPINA4	10	10	10	34.4	34.4	34.4	48.541	117.91	6080500000	416
Leukocyte elastase inhibitor	P30740	SERPINB1	5	5	5	17.2	17.2	17.2	42.741	9.9266	163760000	9
Coronin-1A	P31146	CORO1A	2	2	2	4.6	4.6	4.6	51.026	4.4781	52721000	3
Protein S100-A11;Protein S100-A11, N-terminally processed	P31949	S100A11	2	2	2	25.7	25.7	25.7	11.74	6.2725	412310000	14
Serum amyloid A-4 protein	P35542	SAA4	2	2	2	18.5	18.5	18.5	14.746	6.6144	522670000	5
Myosin-9	P35579	MYH9	15	15	15	12.6	12.6	12.6	226.53	218.48	664180000	38
Insulin-like growth factor-binding protein complex acid labile subunit	P35858	IGFALS	13	13	13	31.4	31.4	31.4	66.034	141.55	14644000000	821
Chitinase-3-like protein 1	P36222	CHI3L1	4	4	4	17.8	17.8	17.8	42.625	43.667	456470000	28
Pigment epithelium-derived factor	P36955	SERPINF1	12	12	12	35.9	35.9	35.9	46.312	162.09	13787000000	876
Complement factor H-related protein 2	P36980	CFHR2	4	2	2	17.4	8.5	8.5	30.65	4.9707	116020000	8
Transgelin-2	P37802	TAGLN2	2	2	2	16.1	16.1	16.1	22.391	6.2005	324940000	12
Transaldolase	P37837	TALDO1	2	2	2	7.1	7.1	7.1	37.54	6.9138	77039000	6
Macrophage-capping protein	P40121	CAPG	2	2	2	8.3	8.3	8.3	38.498	6.1205	100940000	9
Myeloid cell nuclear differentiation antigen	P41218	MNDA	2	2	2	6.4	6.4	6.4	45.836	4.9117	100720000	4
Prostaglandin-H2 D-isomerase	P41222	PTGDS	3	3	3	25.8	25.8	25.8	21.029	34.834	1392100000	124
Biotinidase	P43251	BTD	5	5	5	10.9	10.9	10.9	61.132	11.927	1616800000	37
Killer cell immunoglobulin-like receptor 2DL1	P43626	KIR2DL1	1	1	1	4.9	4.9	4.9	38.504	4.3598	17201000	2
Afamin	P43652	AFM	15	15	15	26.4	26.4	26.4	69.068	268.39	24557000000	1057
Ras GTPase-activating-like protein IQGAP1	P46940	IQGAP1	3	3	3	2.8	2.8	2.8	189.25	7.2907	215210000	6
Cartilage oligomeric matrix protein	P49747	COMP	11	11	11	22.3	22.3	22.3	82.86	86.274	3792600000	226
Lumican	P51884	LUM	10	10	10	34.9	34.9	34.9	38.429	303.51	14058000000	750
6-phosphogluconate dehydrogenase, decarboxylating	P52209	PGD	6	6	6	20.1	20.1	20.1	53.139	18.779	541940000	38
Rho GDP-dissociation inhibitor 1	P52565	ARHGDIA	2	2	2	15.7	15.7	15.7	23.207	4.2926	93261000	4
Rho GDP-dissociation inhibitor 2	P52566	ARHGDIB	3	3	3	28.9	28.9	28.9	22.988	7.8393	214210000	11
Zinc finger protein 142	P52746	ZNF142	1	1	1	0.9	0.9	0.9	187.88	4.6406	2305800000	30
F-actin-capping protein subunit alpha-1	P52907	CAPZA1	3	3	3	15	15	15	32.922	12.097	175790000	7
Phospholipid transfer protein	P55058	PLTP	9	9	9	24.5	24.5	24.5	54.739	92.102	9870700000	565
Triosephosphate isomerase	P60174	TPI1	3	3	3	18.5	18.5	18.5	30.791	37.435	328860000	19
Actin, cytoplasmic 1;Actin, cytoplasmic 1, N-terminally processed	P60709	ACTB	16	16	1	52.5	52.5	4.5	41.736	323.31	34306000000	1121
Actin-related protein 3	P61158	ACTR3	2	2	2	10	10	10	47.371	6.3767	140690000	6
ADP-ribosylation factor 1;ADP-ribosylation factor 3;ADP-ribosylation factor 5;ADP-ribosylation factor 4	P84077;P61204;P84085;P18085	ARF1;ARF3;ARF5;ARF4	2	2	2	19.3	19.3	19.3	20.697	4.197	38750000	4
Lysozyme C	P61626	LYZ	3	3	3	29.7	29.7	29.7	16.537	162.64	1385000000	97
Beta-2-microglobulin;Beta-2-microglobulin form pI 5.3	P61769	B2M	2	2	2	26.9	26.9	26.9	13.714	28.028	659340000	11
Thymosin beta-4;Hematopoietic system regulatory peptide	P62328	TMSB4X	1	1	1	31.8	31.8	31.8	5.0526	4.6141	274600000	11
Histone H4	P62805	HIST1H4A	2	2	2	19.4	19.4	19.4	11.367	5.3532	277680000	9
Peptidyl-prolyl cis-trans isomerase A;Peptidyl-prolyl cis-trans isomerase A, N-terminally processed	P62937	PPIA	5	5	5	35.8	35.8	35.8	18.012	16.913	1186400000	62
14-3-3 protein zeta/delta	P63104	YWHAZ	3	3	2	16.7	16.7	12.7	27.745	9.9438	418470000	31
Actin, cytoplasmic 2;Actin, cytoplasmic 2, N-terminally processed	P63261	ACTG1	16	1	1	52.5	4.5	4.5	41.792	48.48	2252600000	197
Actin, alpha skeletal muscle;Actin, alpha cardiac muscle 1;Actin, gamma-enteric smooth muscle;Actin, aortic smooth muscle	P68133;P68032;P63267;P62736	ACTA1;ACTC1;ACTG2;ACTA2	6	1	1	17.2	4.2	4.2	42.051	27.164	4136500000	74
Putative elongation factor 1-alpha-like 3;Elongation factor 1-alpha 1;Elongation factor 1-alpha 2	Q5VTE0;P68104;Q05639	EEF1A1P5;EEF1A1;EEF1A2	2	2	2	8.4	8.4	8.4	50.184	7.2217	108640000	6
Tubulin alpha-1A chain;Tubulin alpha-1B chain;Tubulin alpha-1C chain;Tubulin alpha-3E chain;Tubulin alpha-3C/D chain	Q71U36;P68363;Q9BQE3;Q6PEY2;Q13748	TUBA1A;TUBA1B;TUBA1C;TUBA3E;TUBA3C	4	4	2	14.4	14.4	5.3	50.135	16.645	323950000	12
Hemoglobin subunit beta;LVV-hemorphin-7;Spinorphin	P68871	HBB	12	12	6	83.7	83.7	55.8	15.998	323.31	40468000000	1021
Hemoglobin subunit alpha	P69905	HBA1	6	6	6	58.5	58.5	58.5	15.257	85.288	10472000000	209
Neutrophil gelatinase-associated lipocalin	P80188	LCN2	6	6	6	44.9	44.9	44.9	22.588	39.03	1058600000	50
Protein S100-A12;Calcitermin	P80511	S100A12	3	3	3	21.7	21.7	21.7	10.575	53.372	1783000000	54
Dermcidin;Survival-promoting peptide;DCD-1	P81605	DCD	2	2	2	12.7	12.7	12.7	11.284	4.9888	92311000	6
Adenylyl cyclase-associated protein 1	Q01518	CAP1	2	2	2	7.6	7.6	7.6	51.901	12.153	426450000	22
Complement factor H-related protein 1	Q03591	CFHR1	7	4	2	25.2	17.3	10	37.65	31.49	649340000	43
Inter-alpha-trypsin inhibitor heavy chain H3	Q06033	ITIH3	15	15	15	20.1	20.1	20.1	99.848	130.1	5264100000	345
Galectin-3-binding protein	Q08380	LGALS3BP	6	6	6	12.6	12.6	12.6	65.33	15.53	1798600000	110
EGF-containing fibulin-like extracellular matrix protein 1	Q12805	EFEMP1	5	5	5	10.8	10.8	10.8	54.64	46.151	1159500000	129
Apolipoprotein F	Q13790	APOF	2	2	2	8.3	8.3	8.3	35.399	22.705	488800000	29
Hyaluronan-binding protein 2;Hyaluronan-binding protein 2 50 kDa heavy chain;Hyaluronan-binding protein 2 50 kDa heavy chain alternate form;Hyaluronan-binding protein 2 27 kDa light chain;Hyaluronan-binding protein 2 27 kDa light chain alternate form	Q14520	HABP2	2	2	2	6.8	6.8	6.8	62.671	4.2742	917910000	15
Inter-alpha-trypsin inhibitor heavy chain H4;70 kDa inter-alpha-trypsin inhibitor heavy chain H4;35 kDa inter-alpha-trypsin inhibitor heavy chain H4	Q14624	ITIH4	35	35	35	37.8	37.8	37.8	103.36	323.31	80909000000	2988
Periostin	Q15063	POSTN	10	10	10	23.1	23.1	23.1	93.313	94.791	781650000	52
Ficolin-2	Q15485	FCN2	2	2	2	11.8	11.8	11.8	34.001	5.2341	346900000	12
Transforming growth factor-beta-induced protein ig-h3	Q15582	TGFBI	3	3	3	5.9	5.9	5.9	74.68	9.419	1488000000	59
Adiponectin	Q15848	ADIPOQ	2	2	2	13.9	13.9	13.9	26.413	5.0624	60708000	2
Extracellular matrix protein 1	Q16610	ECM1	3	3	3	7.2	7.2	7.2	60.673	9.8839	1043700000	114
UTP--glucose-1-phosphate uridylyltransferase	Q16851	UGP2	2	2	2	7.5	7.5	7.5	56.94	5.9331	65126000	4
Transmembrane protein 198	Q66K66	TMEM198	1	1	1	2.5	2.5	2.5	39.474	5.796	37463000000	98
KDEL motif-containing protein 2	Q7Z4H8	KDELC2	1	1	1	3.2	3.2	3.2	58.572	3.975	79735000	2
Scavenger receptor cysteine-rich type 1 protein M130;Soluble CD163	Q86VB7	CD163	3	3	3	4	4	4	125.45	8.0952	635250000	53
Protocadherin Fat 3	Q8TDW7	FAT3	3	3	3	1	1	1	505.52	4.978	724000000	11
Proteoglycan 4;Proteoglycan 4 C-terminal part	Q92954	PRG4	16	16	16	10.3	10.3	10.3	151.08	120.6	27431000000	1271
Carboxypeptidase B2	Q96IY4	CPB2	5	5	5	17.7	17.7	17.7	48.424	24.247	1240000000	51
Beta-Ala-His dipeptidase	Q96KN2	CNDP1	3	3	3	11	11	11	56.705	10.102	288580000	6
N-acetylmuramoyl-L-alanine amidase	Q96PD5	PGLYRP2	14	14	14	36.8	36.8	36.8	62.216	136.22	12162000000	684
Vacuolar protein sorting-associated protein 13A	Q96RL7	VPS13A	2	2	2	0.9	0.9	0.9	360.27	5.6887	147550000	2
Cartilage acidic protein 1	Q9NQ79	CRTAC1	15	15	15	27.2	27.2	27.2	71.42	323.31	11246000000	863
Complement C1r subcomponent-like protein	Q9NZP8	C1RL	3	3	3	7.8	7.8	7.8	53.498	5.1264	418460000	17
Protein Z-dependent protease inhibitor	Q9UK55	SERPINA10	1	1	1	3.6	3.6	3.6	50.706	4.2492	454040000	41
IgGFc-binding protein	Q9Y6R7	FCGBP	4	4	4	2.6	2.6	2.6	572.01	7.485	89431000	4
